# Supplementary material for: Continuous mechanical exfoliation of graphene sheets via three-roll mill
Source: Royal Society of Chemistry journal article supplement (doi:10.1039/c2jm33740a), 2012-01-01
Supplement: c2jm33740a.pdf [file c2jm33740a.pdf]

## Continuous mechanical exfoliation of graphene sheets via three-roll mill

J. Chen et al.

Electronic supporting information:

Poly Vinyl Chloride (PVC, 2.0g) and Dioctyl phthalate (DOP, 50ml) were used to prepare an adhesive. Then added the adhesive to the feed and centre rolls of the three-roll mill. After that, the prepared natural graphite were spreading on to the rolls. The living video of the exfoliation process is presented here.

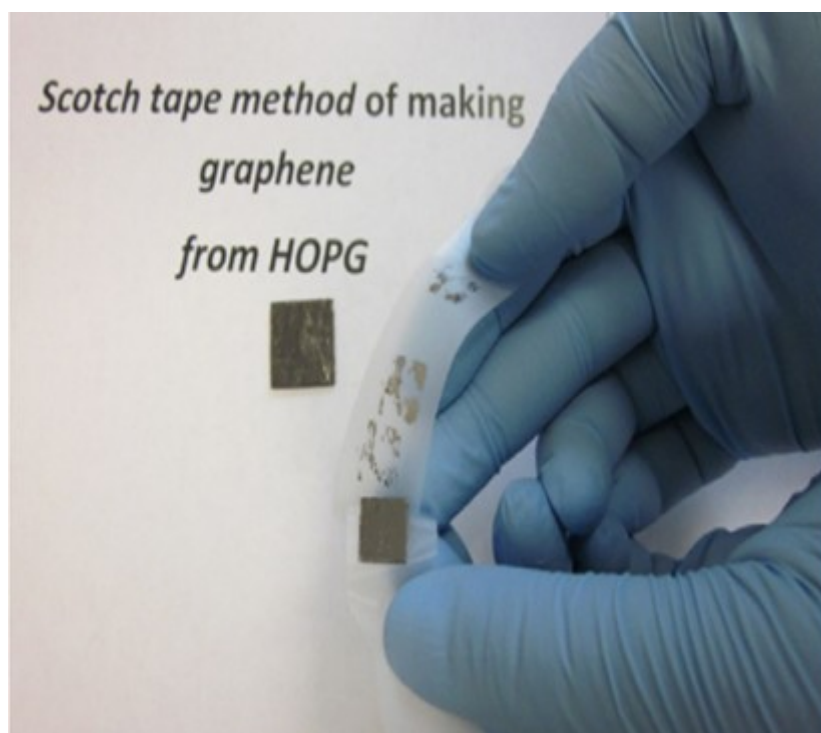

**Fig. S1 Mechanical exfoliation of graphene using scotch tape from HOPG.**

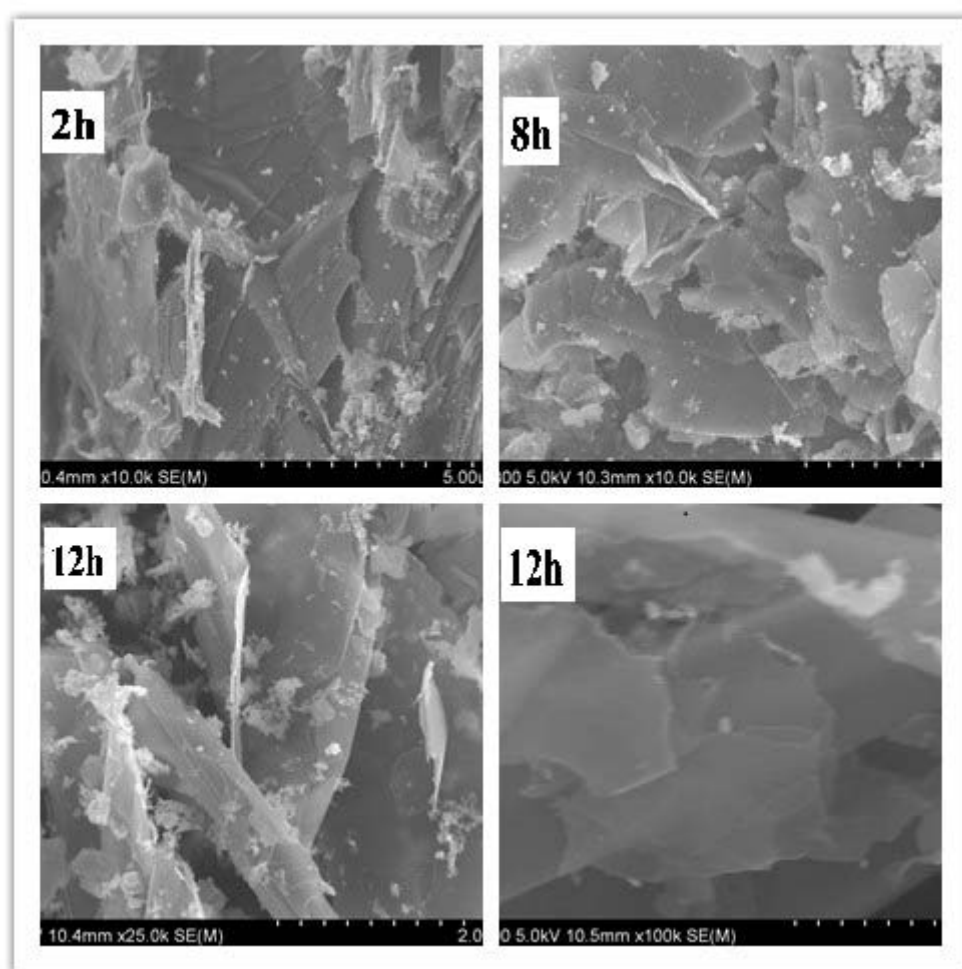

**Fig. S2** The SEM of the graphene product by the different milling time.

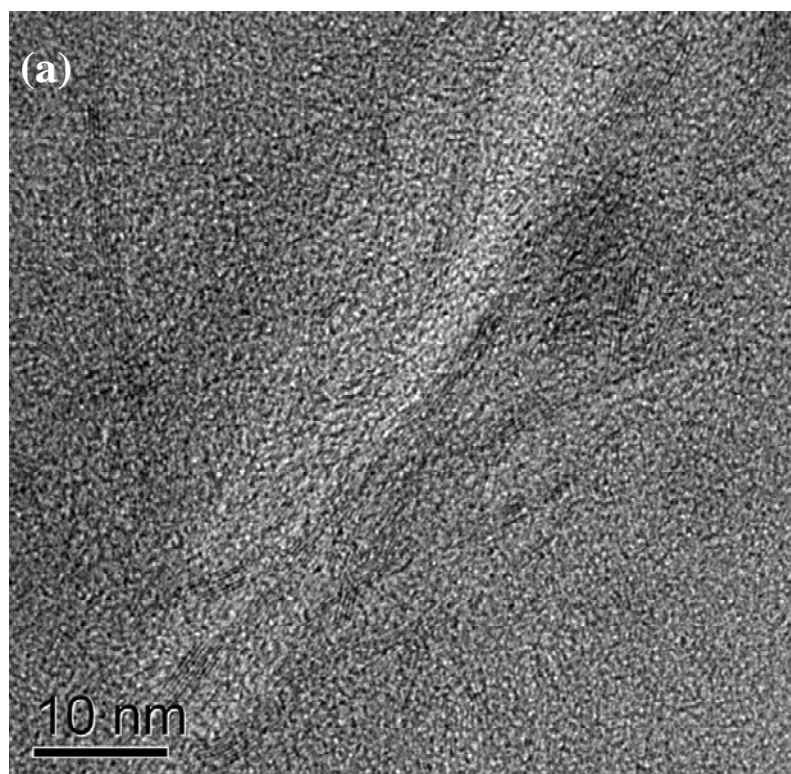

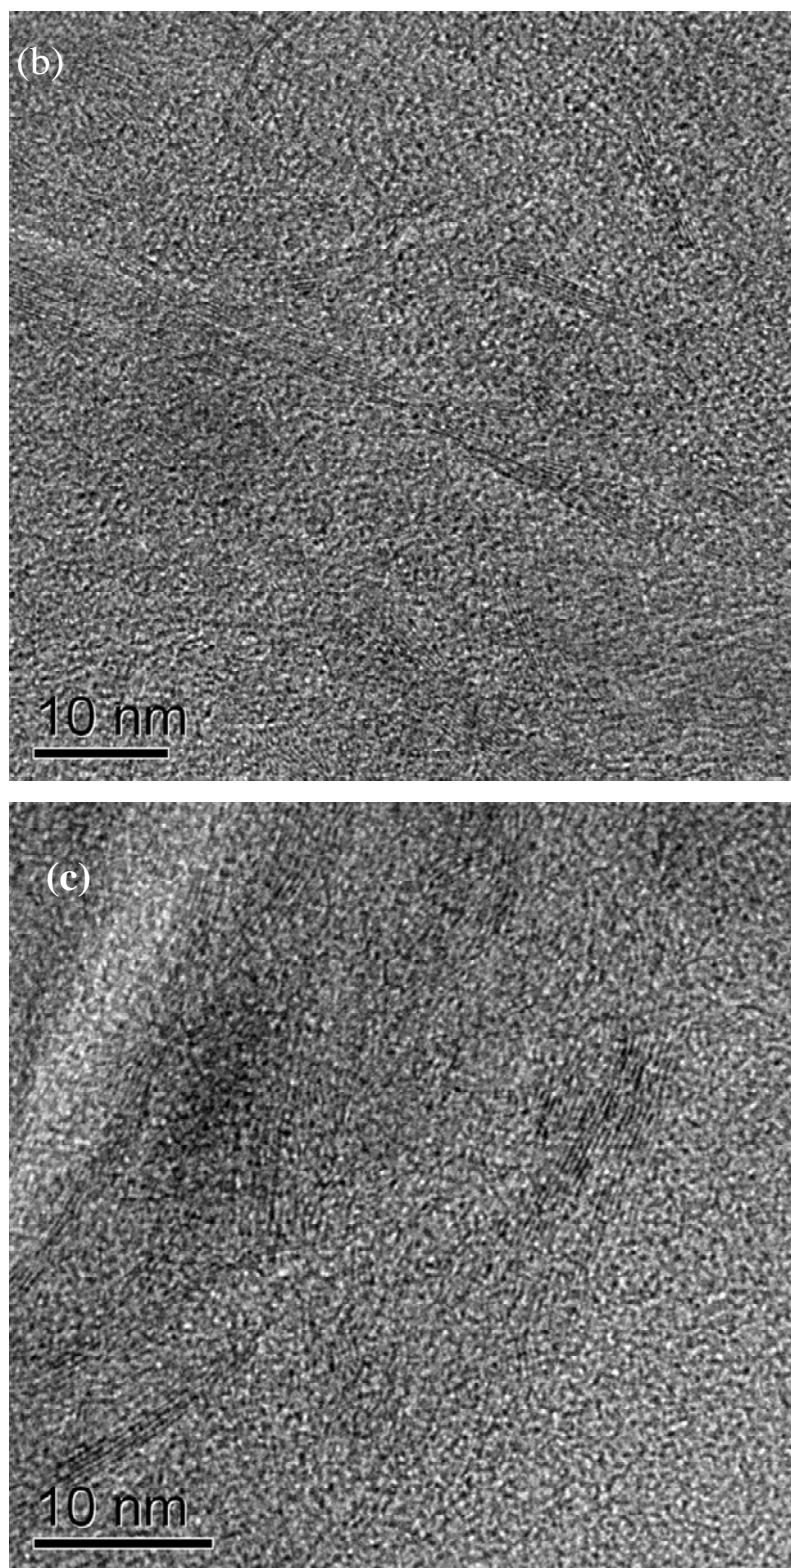

**Fig. S3 Representative HRTEM images of graphene flakes to estimate the ratio of the single-layer flakes.**
